# Supplementary material for: Exploring the Binding Pattern of Geraniol with Acetylcholinesterase through In Silico Docking, Molecular Dynamics Simulation, and In Vitro Enzyme Inhibition Kinetics Studies
Source: MDPI journal article supplement (doi:10.3390/cells10123533), 2021-12-14
Supplement: s1 [file s1]

## Supplementary files:

# Exploring the binding pattern of Geraniol with acetylcholinesterase through in-silico docking, molecular dynamics simulation and in-vitro enzyme inhibition kinetics studies

Danish Iqbal <sup>1, #</sup>, M. Salman Khan <sup>2, \*</sup>, Mohd Waiz <sup>2</sup>, Md Tabish Rehman <sup>3</sup>, Mohammed Alaidarous <sup>1,5</sup>, Abdulaziz S. Alothaim <sup>6</sup>, Azfar Jamal <sup>4,6</sup>, Mohamed F AlAjmi <sup>3</sup>, Bader Mohammed Alshehri <sup>1</sup>, Saeed Banawas <sup>1,4,5</sup>, Mohammed Alsaweed <sup>1</sup>, Yahya Madkhali <sup>1</sup>, Abdulrahman Algarni <sup>7</sup>, Suliman A. Alsagabi <sup>1</sup>, and Wael Alturaiki <sup>1</sup>

<sup>1</sup> Department of Medical Laboratory Sciences, College of Applied Medical Sciences, Majmaah University, Al-Majmaah, 11952, Saudi Arabia; [da.mohammed@mu.edu.sa](mailto:da.mohammed@mu.edu.sa) (D.I.), [m.alaidarous@mu.edu.sa](mailto:m.alaidarous@mu.edu.sa) (M.A.), [w.alturaiki@mu.edu.sa](mailto:w.alturaiki@mu.edu.sa) (W.T.), [m.alsaweed@mu.edu.sa](mailto:m.alsaweed@mu.edu.sa) (M.A.), [b.alshehri@mu.edu.sa](mailto:b.alshehri@mu.edu.sa) (B.M.A.), [y.madkhali@mu.edu.sa](mailto:y.madkhali@mu.edu.sa) (Y.M.), [s.alsqabi@mu.edu.sa](mailto:s.alsqabi@mu.edu.sa) (S.A.A.)

<sup>2</sup> Clinical Biochemistry & Natural Product research laboratory, Department of Biosciences, Integral University, lucknow-226026, U.P., India; [contactskhan@gmail.com](mailto:contactskhan@gmail.com) (M.S.K.), [mohdwaiz032@gmail.com](mailto:mohdwaiz032@gmail.com) (M.W.)

<sup>3</sup> Department of Pharmacognosy, College of Pharmacy, King Saud University, Riyadh 11451, Saudi Arabia; [mrehman@ksu.edu.sa](mailto:mrehman@ksu.edu.sa) (M.T.R.), [malajmii@ksu.edu.sa](mailto:malajmii@ksu.edu.sa) (M.F.A.)

<sup>4</sup> Health and Basic Sciences Research Center, Majmaah University, Al Majmaah 15341, Saudi Arabia; [s.banawas@mu.edu.sa](mailto:s.banawas@mu.edu.sa) (S.B.)

<sup>5</sup> Department of Biomedical Sciences, Oregon State University, Corvallis, Oregon 97331, United States

<sup>6</sup> Department of Biology, College of Science. Al-Zulfi, Majmaah University, Majmaah 11952, Riyadh Region, Saudi Arabia; [a.alothaim@mu.edu.sa](mailto:a.alothaim@mu.edu.sa) (A.S.A.), [azfarjamal@mu.edu.sa](mailto:azfarjamal@mu.edu.sa) (A.J.)

<sup>7</sup> Department of Medical Laboratory Technology MLT, Faculty of Applied Medical Sciences, Northern Border University, Arar, P.O. Box: 1321, Saudi Arabia; [abdulrahman.eid@nbu.edu.sa](mailto:abdulrahman.eid@nbu.edu.sa) (A.A.)

\* Correspondence: [contactskhan@gmail.com](mailto:contactskhan@gmail.com) (M.S.K.)

# Co-correspondence: [da.mohammed@mu.edu.sa](mailto:da.mohammed@mu.edu.sa) (D.I.)

**Figure S1.** Interaction of target protein, AChE with non-hydrolysable structural analogs peripheral anionic site (PAS); (A) Superimpose image of non-hydrolysable structural analogs in PAS locations of AChE, (B & C) Interactions between PAS residues of AChE and non-hydrolysable structural analogs. (No binding of acetylcholine was observed at the peripheral anionic site (PAS)).

**Figure S2.** Interaction of target protein, AChE with non-hydrolysable structural analogs and acetylcholine at catalytic active site (CAS); (A) Superimpose image of non-hydrolysable structural analogs and acetylcholine in CAS locations of AChE, (B & C) Interactions between CAS residues of AChE and non-hydrolysable structural analogs, (D) Interactions between CAS residues of AChE and Acetylcholine.

**Supplementary Table 1.** Molecular docking parameters for the interaction of acetylcholinesterase (AChE) with some non-hydrolysable structural analogs at catalytic active site (CAS), and peripheral anionic site (PAS).

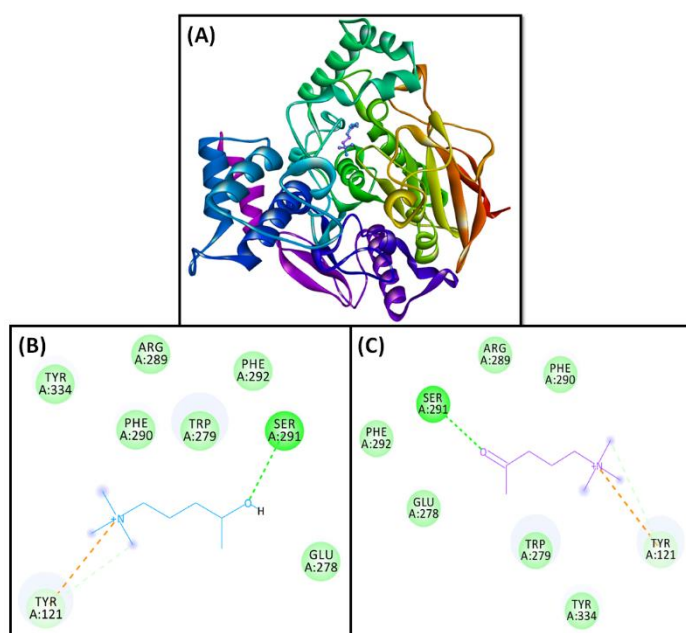

**Figure S1.** Interaction of target protein, AChE with non-hydrolysable structural analogs peripheral active site (PAS); (A) Superimpose image of non-hydrolysable structural analogs in PAS locations of AChE, (B & C) Interactions between PAS residues of AChE and non-hydrolysable structural analogs. (No binding of acetylcholine was observed at the peripheral catalytic site (PAS)).

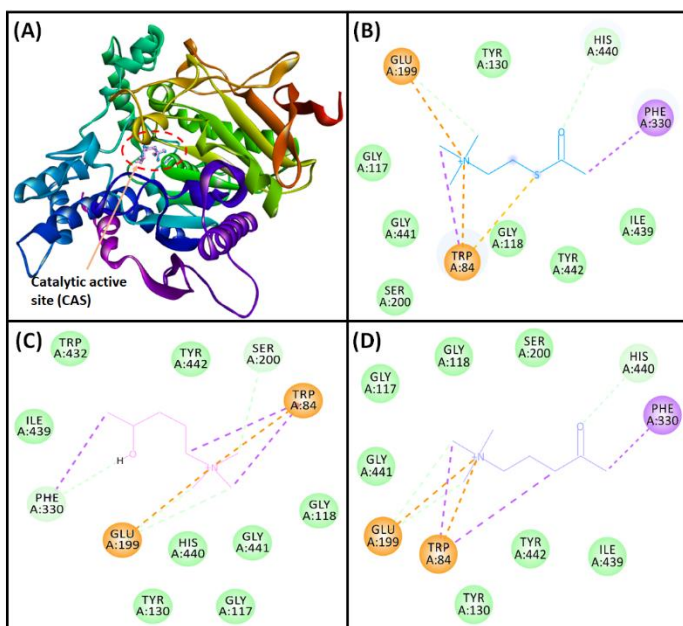

**Figure S2.** Interaction of target protein, AChE with non-hydrolysable structural analogs and acetylcholine at catalytic active site (CAS); (A) Superimpose image of non-hydrolysable structural analogs and acetylcholine in CAS locations of AChE, (B) Interactions between CAS residues of AChE and Acetylthiocholine. (C & D) Interactions between CAS residues of AChE and non-hydrolysable structural analogs.

**Supplementary Table S1.** Molecular docking parameters for the interaction of acetylcholinesterase (AChE) with some non-hydrolysable structural analogs at catalytic active site (CAS), and peripheral anionic site (PAS).

| Donor-Acceptor pair                                 | Distance (Å) | Category of Interaction | Type of Interaction  | Docking energy, kcal mol <sup>-1</sup> | Binding affinity, M <sup>-1</sup> |
|-----------------------------------------------------|--------------|-------------------------|----------------------|----------------------------------------|-----------------------------------|
| Acetylthiocholine (CAS)*                            |              |                         |                      |                                        |                                   |
| LIG:N - GLU199:OE1                                  | 3.881        | Electrostatic           | Attractive Charge    | -4.5                                   | 1.99 x 10 <sup>3</sup>            |
| HIS440:CD2 - LIG:O                                  | 3.66         | Hydrogen Bond           | Carbon Hydrogen Bond |                                        |                                   |
| LIG:C - GLU199:OE1                                  | 3.52         | Hydrogen Bond           | Carbon Hydrogen Bond |                                        |                                   |
| LIG:N - TRP84                                       | 4.27         | Electrostatic           | Pi-Cation            |                                        |                                   |
| LIG:C - TRP84                                       | 3.72         | Hydrophobic             | Pi-Sigma             |                                        |                                   |
| LIG:C - PHE330                                      | 3.61         | Hydrophobic             | Pi-Sigma             |                                        |                                   |
| LIG:S - TRP84                                       | 3.70         | Other                   | Pi-Sulfur            |                                        |                                   |
| 4,4-Dihydroxy-N,N,N-trimethylpentan-1-aminium (CAS) |              |                         |                      |                                        |                                   |
| LIG:N - GLU199:OE1                                  | 4.08         | Electrostatic           | Attractive Charge    | -5.0                                   | 4.65 x 10 <sup>3</sup>            |
| LIG:C - GLU199:OE1                                  | 3.62         | Hydrogen Bond           | Carbon Hydrogen Bond |                                        |                                   |
| LIG:C - SER200:OG                                   | 3.60         | Hydrogen Bond           | Carbon Hydrogen Bond |                                        |                                   |
| LIG:C - GLU199:OE1                                  | 3.77         | Hydrogen Bond           | Carbon Hydrogen Bond |                                        |                                   |
| LIG:N - TRP84                                       | 4.87         | Electrostatic           | Pi-Cation            |                                        |                                   |
| LIG:N - TRP84                                       | 4.23         | Electrostatic           | Pi-Cation            |                                        |                                   |
| LIG:H - PHE330                                      | 3.05         | Hydrogen Bond           | Pi-Donor Hydrogen    |                                        |                                   |
| LIG:C - TRP84                                       | 3.95         | Hydrophobic             | Bond                 |                                        |                                   |
| LIG:C - TRP84                                       | 3.84         | Hydrophobic             | Pi-Sigma             |                                        |                                   |
| LIG:C - PHE330                                      | 3.53         | Hydrophobic             | Pi-Sigma             |                                        |                                   |

| Pi-Sigma                                                   |         |               |                      |      |                 |
|------------------------------------------------------------|---------|---------------|----------------------|------|-----------------|
| <b>N,N,N-trimethyl-4-oxopentan-1-aminium (CAS)</b>         |         |               |                      |      |                 |
| LIG:N - GLU199:OE1                                         | 3.949   | Electrostatic | Attractive Charge    |      |                 |
| HIS440:CD2 - LIG:O                                         | 3.62    | Hydrogen Bond | Carbon Hydrogen Bond |      |                 |
| LIG:C - GLU199:OE1                                         | 3.55    | Hydrogen Bond | Carbon Hydrogen Bond |      |                 |
| LIG:C - GLU199:OE1                                         | 3.58    | Hydrogen Bond | Carbon Hydrogen Bond |      |                 |
| LIG:C - GLU199:OE2                                         | 3.78    | Hydrogen Bond | Carbon Hydrogen Bond | -5.0 | 4.65 x          |
| LIG:N - TRP84                                              | 4.94    | Electrostatic | Pi-Cation            |      | 10 <sup>3</sup> |
| LIG:N - TRP84                                              | 4.23    | Electrostatic | Pi-Cation            |      |                 |
| LIG:C - TRP84                                              | 3.67    | Hydrophobic   | Pi-Sigma             |      |                 |
| LIG:C - PHE330                                             | 3.59    | Hydrophobic   | Pi-Sigma             |      |                 |
| LIG:C - TRP84                                              | 3.80    | Hydrophobic   | Pi-Sigma             |      |                 |
| <b>4,4-Dihydroxy-N,N,N-trimethylpentan-1-aminium (PAS)</b> |         |               |                      |      |                 |
| SER291:HN - LIG:O                                          | 2.16    | Hydrogen Bond | Conventional H-Bond  |      |                 |
| SER291:CB - LIG:O                                          | 3.49    | Hydrogen Bond | Carbon Hydrogen Bond | -4.8 | 3.32 x          |
| LIG:C - TYR121:OH                                          | 3.56    | Hydrogen Bond | Carbon Hydrogen Bond |      | 10 <sup>3</sup> |
| LIG:N - TYR121                                             | 4.86    | Electrostatic | Pi-Cation            |      |                 |
| <b>N,N,N-trimethyl-4-oxopentan-1-aminium (PAS)</b>         |         |               |                      |      |                 |
| SER291:HN - LIG:O                                          | 2.14479 | Hydrogen Bond | Conventional H-Bond  |      |                 |
| SER291:CB - LIG:O                                          | 3.49151 | Hydrogen Bond | Carbon Hydrogen Bond | -4.8 | 3.92 x          |
| LIG:C - TYR121:OH                                          | 3.59372 | Hydrogen Bond | Carbon Hydrogen Bond |      | 10 <sup>3</sup> |
| LIG:N - TYR121                                             | 4.88618 | Electrostatic | Pi-Cation            |      |                 |

\*No binding of acetylcholine was observed at the peripheral anionic site (PAS).
